# Supplementary material for: Gyroscope Calibration and Dead Reckoning for an Autonomous Underwater Vehicle
Source: Royal Society of Chemistry journal article supplement (doi:10.1039/c9ra09473c), 2005-07-28
Supplement: c9ra09473c1.pdf [file c9ra09473c1.pdf]

## Supplementary Information

# **Z-scheme 2D-m-BiVO<sub>4</sub> Networks Decorated by g-CN Nanosheets Heterostructured Photocatalyst with Excellent Response to Visible Light**

**Toheed Ahmed<sup>a,b,c\*</sup>, Muhammad Ammar<sup>b,d\*</sup>, Aimen Saleem<sup>e</sup>, Hong-ling Zhang<sup>a</sup>, Hong-  
bin Xu<sup>a</sup>**

<sup>a</sup> Key Laboratory of Green Process and Engineering, Institute of Process Engineering, Chinese Academy of Sciences, Beijing 100190, China.

<sup>b</sup> University of Chinese Academy of Sciences, Beijing 100049, China.

<sup>c</sup> Department of Applied Chemistry, Government College University, Faisalabad 38000, Pakistan.

<sup>d</sup> Department of Chemical Engineering Technology, Government College University, Faisalabad 38000, Pakistan.

<sup>e</sup> Biotechnology and Fermentation Group, Department of Animal Sciences, The Ohio State University and QARDC, Wooster Ohio 44691, USA.

\* **Corresponding author:** toheedahmed@gcuf.edu.pk (T. Ahmed), mammar@gcuf.edu.pk (M. Ammar), Tel/Fax: +92419203027.

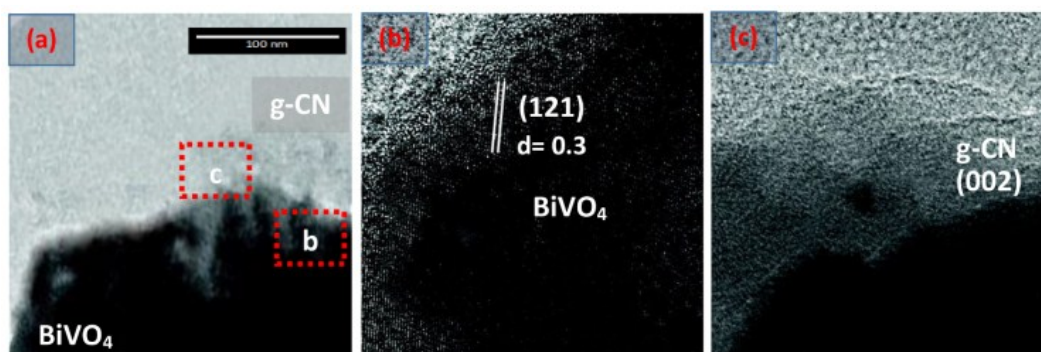

**Fig. S1** TEM images of the as-obtained samples: (a)  $\text{BiVO}_4$ , (c)  $\text{BiVO}_4/\text{g-CN}$  (6mg);  
HRTEM images of (b, c)  $\text{BiVO}_4/\text{g-CN}$  (6mg).

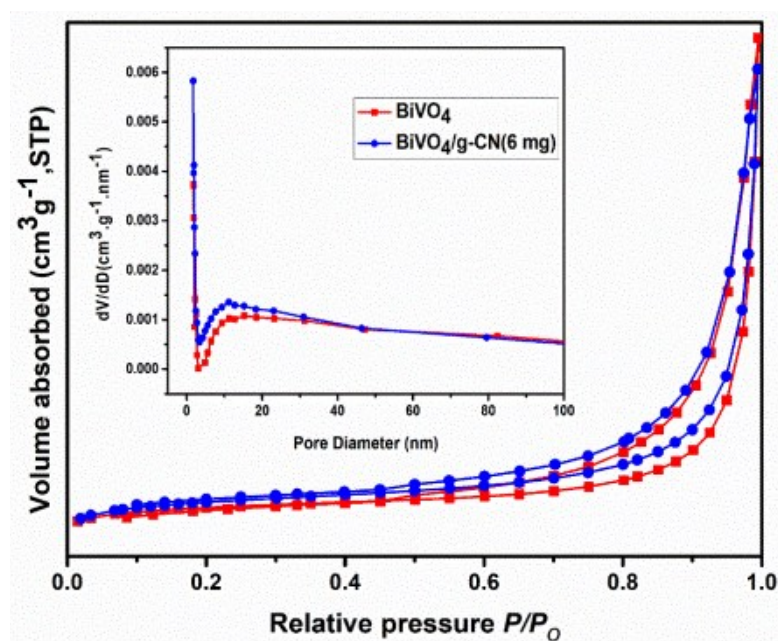

**Fig. S2** Nitrogen adsorption/desorption isotherms, and pore-size distributions of the as-prepared samples.

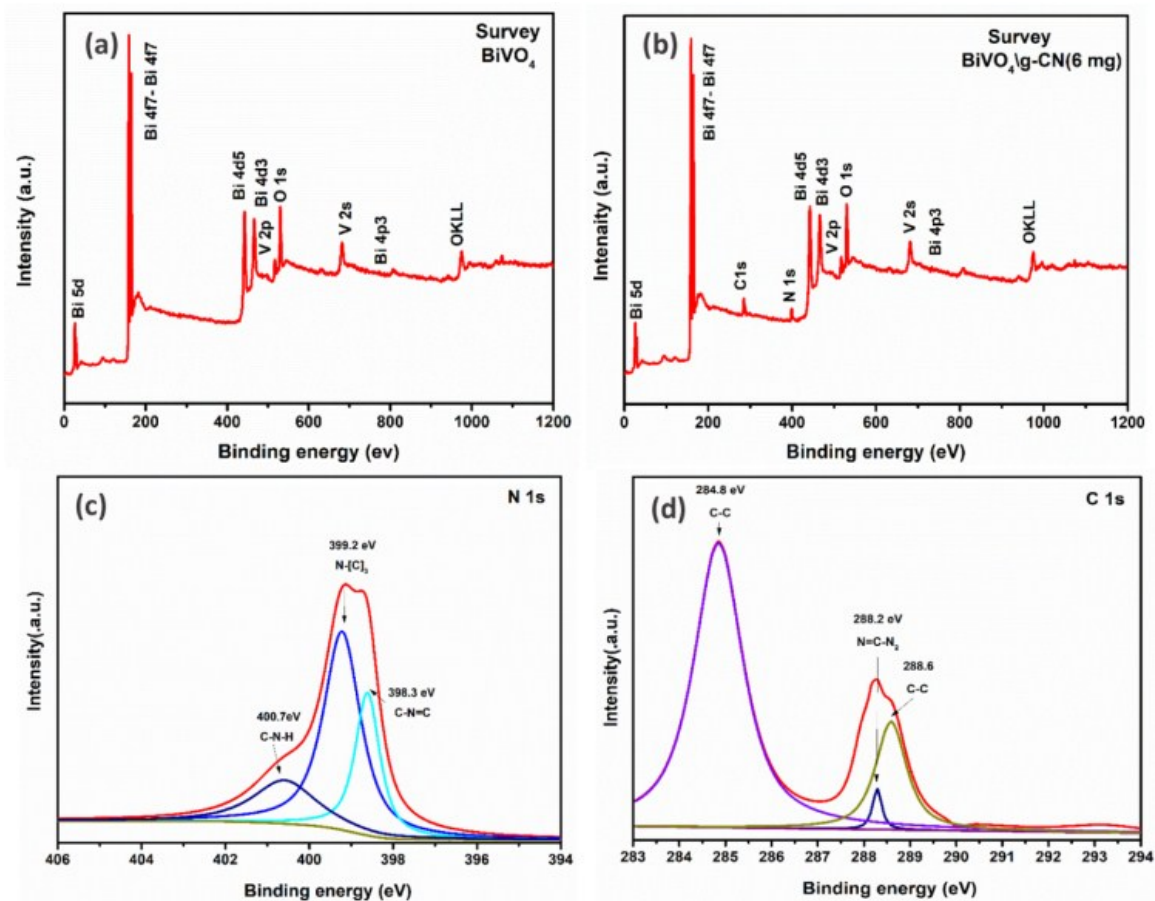

**Fig. S3** XPS survey spectrum of (a)  $\text{BiVO}_4$  (b)  $\text{BiVO}_4/\text{g-CN}$  (6mg), XPS spectra of  $\text{BiVO}_4/\text{g-CN}$  (6mg) (c) N1s (d) C1s.

**Table S1** Surface properties of prepared pure BiVO<sub>4</sub> and BiVO<sub>4</sub>/g-CN (6 mg).

| Samples                        | Pore Volume<br>(cm <sup>3</sup> g <sup>-1</sup> ) | Average Particle<br>Size<br>(nm) | Average Pore Size<br>(nm) |
|--------------------------------|---------------------------------------------------|----------------------------------|---------------------------|
| BiVO <sub>4</sub>              | 0.15133                                           | 239.6738                         | 24.7082                   |
| BiVO <sub>4</sub> /g-CN (6 mg) | 0.12529                                           | 290.5873                         | 31.1876                   |
